# Supplementary material for: Pioneering Inventors or Thicket Builders: Which U.S. Firms Use Continuations in Patenting?
Source: Atypon-hosted journal article supplement (doi:10.1287/mnsc.1090.1016), 2009-05-15
Supplement: mnsc.1090.1016-sm-ec.pdf [file mnsc.1090.1016-sm-ec.pdf]

**e - c o m p a n i o n**

ONLY AVAILABLE IN ELECTRONIC FORM

Electronic Companion—"Pioneering Inventors or Thicket Builders:  
Which U.S. Firms Use Continuations in Patenting?" by Deepak Hegde,  
David C. Mowery, and Stuart J. H. Graham, *Management Science*,  
DOI 10.1287/mnsc.1090.1016.

---

PIONEERING INVENTORS OR THICKET- BUILDERS: WHICH U.S. FIRMS USE CONTINUATIONS IN PATENTING?

Deepak Hegde, David C. Mowery and Stuart J. H. Graham

**Online Appendix (Supplementary Tables)**

TABLE A1: CONTINUATIONS PROPENSITIES FOR COMPUSTAT-MATCHED AND OUT-OF-SAMPLE PATENTS

|                                      | Ordinary patents | CAP       | CIP       | Divisional | Combination | N       |
|--------------------------------------|------------------|-----------|-----------|------------|-------------|---------|
| <u>Overall</u>                       |                  |           |           |            |             |         |
| Compustat matched patents            | 0.734            | 0.091     | 0.060     | 0.069      | 0.058       | 363,308 |
| Omitted observations                 | 0.699            | 0.083     | 0.091     | 0.061      | 0.065       | 602,706 |
| Difference                           | [0.035]*         | [0.008]*  | [-0.032]* | [0.007]*   | [-0.018]*   |         |
| <u>Chemicals</u>                     |                  |           |           |            |             |         |
| Compustat matched patents            | 0.657            | 0.074     | 0.097     | 0.103      | 0.071       | 74,600  |
| Omitted observations                 | 0.627            | 0.078     | 0.110     | 0.099      | 0.085       | 108,330 |
| Difference                           | [0.029]*         | [-0.005]* | [-0.014]* | [0.004]    | [-0.015]*   |         |
| <u>Drugs &amp; Medicine</u>          |                  |           |           |            |             |         |
| Compustat matched patents            | 0.558            | 0.118     | 0.116     | 0.087      | 0.121       | 31,176  |
| Omitted observations                 | 0.531            | 0.112     | 0.144     | 0.071      | 0.143       | 89,098  |
| Difference                           | [0.028]*         | [0.006]*  | [-0.028]* | [0.016]*   | [-0.022]*   |         |
| <u>Electrical &amp; Electronics</u>  |                  |           |           |            |             |         |
| Compustat matched patents            | 0.775            | 0.085     | 0.035     | 0.072      | 0.033       | 78,121  |
| Omitted observations                 | 0.774            | 0.070     | 0.070     | 0.050      | 0.037       | 101,607 |
| Difference                           | [0.001]          | [0.015]*  | [-0.035]* | [0.023]*   | [-0.004]    |         |
| <u>Computers &amp; Communication</u> |                  |           |           |            |             |         |
| Compustat matched patents            | 0.790            | 0.121     | 0.033     | 0.033      | 0.023       | 92,534  |
| Omitted observations                 | 0.754            | 0.106     | 0.067     | 0.033      | 0.041       | 90,445  |
| Difference                           | [0.036]*         | [0.014]*  | [-0.033]  | [0.000]    | [-0.018]*   |         |
| <u>Mechanical</u>                    |                  |           |           |            |             |         |
| Compustat matched patents            | 0.776            | 0.066     | 0.050     | 0.072      | 0.036       | 49,252  |
| Omitted observations                 | 0.752            | 0.069     | 0.072     | 0.063      | 0.044       | 101,565 |
| Difference                           | [0.025]*         | [-0.003]  | [-0.023]* | [0.009]*   | [-0.008]*   |         |
| <u>Others</u>                        |                  |           |           |            |             |         |
| Compustat matched patents            | 0.758            | 0.071     | 0.069     | 0.062      | 0.040       | 37,591  |
| Omitted observations                 | 0.743            | 0.070     | 0.088     | 0.049      | 0.049       | 111,599 |
| Difference                           | [0.015]*         | [0.000]   | [-0.019]* | [0.012]*   | [-0.008]*   |         |

Table A1 Notes: The table reports differences between Compustat-matched patents that we use in our analysis and all other patents assigned to U.S. businesses in their propensity to file continuations.

\* indicates a statistically significant difference ( $p < 0.001$ ) from means of “ordinary” patents.

PIONEERING INVENTORS OR THICKET- BUILDERS: WHICH U.S. FIRMS USE CONTINUATIONS IN PATENTING?

Deepak Hegde, David C. Mowery and Stuart J. H. Graham

TABLE A2.1: MULTINOMIAL LOGIT ESTIMATES OF CONTINUATIONS DECISIONS FOR CHEMICAL PATENTS (PRIORITY YEARS 1981-2000, ISSUE YEARS 1981-2004)

| Dependent variable: continuation type                                                              |                              |                              |                              |
|----------------------------------------------------------------------------------------------------|------------------------------|------------------------------|------------------------------|
| Explanatory variables                                                                              | <i>CAP</i><br>( <i>j=1</i> ) | <i>CIP</i><br>( <i>j=2</i> ) | <i>Div</i><br>( <i>j=3</i> ) |
| lnRDINT*lnPATINT                                                                                   | 0.066<br>[0.019]**           | 0.098<br>[0.017]**           | -0.062<br>[0.016]**          |
| lnCAPINT*lnPATINT                                                                                  | -0.042<br>[0.023]            | -0.151<br>[0.021]**          | 0.181<br>[0.021]**           |
| FCITES                                                                                             | -0.017<br>[0.006]**          | 0.047<br>[0.004]**           | -0.181<br>[0.008]**          |
| lnPATINT                                                                                           | -0.034<br>[0.107]            | 0.589<br>[0.099]**           | -0.544<br>[0.098]**          |
| lnRDINT                                                                                            | 0.124<br>[0.028]**           | 0.135<br>[0.026]**           | 0.301<br>[0.026]**           |
| lnCAPINT                                                                                           | -0.058<br>[0.038]            | -0.075<br>[0.035]*           | -0.143<br>[0.035]**          |
| TECHSHARE                                                                                          | 0.239<br>[0.103]*            | 0.916<br>[0.092]**           | 0.283<br>[0.095]**           |
| TECHTIME                                                                                           | -0.055<br>[0.009]**          | -0.033<br>[0.009]**          | -0.064<br>[0.007]**          |
| ln employment                                                                                      | -0.071<br>[0.016]**          | 0.042<br>[0.015]**           | 0.011<br>[0.015]             |
| ln AGE                                                                                             | 0.012<br>[0.023]             | 0.002<br>[0.021]             | 0.102<br>[0.021]**           |
| Constant                                                                                           | -1.503<br>[0.316]**          | -2.602<br>[0.307]**          | -1.249<br>[0.291]**          |
| Total Observations                                                                                 | 73520                        |                              |                              |
| Model chi-square                                                                                   | 6847.281                     |                              |                              |
| Standard errors in brackets; * significant at 5%; ** significant at 1%                             |                              |                              |                              |
| Base class: no continuation ( <i>j=0</i> ); Combinations ( <i>j=4</i> ) included, but not reported |                              |                              |                              |
| Industry (SIC)-, Tech (Patent subclass)- & Vintage- effects included                               |                              |                              |                              |

PIONEERING INVENTORS OR THICKET- BUILDERS: WHICH U.S. FIRMS USE CONTINUATIONS IN PATENTING?

Deepak Hegde, David C. Mowery and Stuart J. H. Graham

TABLE A2.2: MULTINOMIAL LOGIT ESTIMATES OF CONTINUATIONS DECISIONS FOR DRUGS & MEDICINE PATENTS (PRIORITY YEARS 1981-2000, ISSUE YEARS 1981-2004)

| Dependent variable: continuation type |                              |                              |                              |
|---------------------------------------|------------------------------|------------------------------|------------------------------|
| Explanatory variables                 | <i>CAP</i><br>( <i>j=1</i> ) | <i>CIP</i><br>( <i>j=2</i> ) | <i>Div</i><br>( <i>j=3</i> ) |
| lnRDINT*lnPATINT                      | 0.047<br>[0.021]*            | 0.037<br>[0.021]             | -0.024<br>[0.024]            |
| lnCAPINT*lnPATINT                     | -0.113<br>[0.026]**          | 0.011<br>[0.029]             | 0.061<br>[0.033]             |
| FCITES                                | -0.026<br>[0.005]**          | 0.02<br>[0.004]**            | -0.066<br>[0.008]**          |
| lnPATINT                              | 0.467<br>[0.106]**           | 0.005<br>[0.120]             | 0.068<br>[0.142]             |
| lnRDINT                               | 0.073<br>[0.037]*            | 0.111<br>[0.038]**           | 0.278<br>[0.045]**           |
| lnCAPINT                              | 0.021<br>[0.048]             | -0.088<br>[0.050]            | -0.063<br>[0.059]            |
| TECHSHARE                             | -0.145<br>[0.103]            | -0.097<br>[0.102]            | 0.279<br>[0.114]*            |
| TECHTIME                              | 0.01<br>[0.011]              | -0.063<br>[0.011]**          | -0.017<br>[0.012]            |
| ln employment                         | -0.088<br>[0.023]**          | 0.005<br>[0.023]             | 0.109<br>[0.026]**           |
| ln AGE                                | -0.069<br>[0.030]*           | -0.019<br>[0.031]            | -0.12<br>[0.031]**           |
| Constant                              | -2.575<br>[1.067]*           | -1.341<br>[0.571]*           | -3.926<br>[1.080]**          |
| Total Observations                    | 31082                        |                              |                              |
| Model chi-square                      | 4885.301                     |                              |                              |

Standard errors in brackets; \* significant at 5%; \*\* significant at 1%  
 Base class: no continuation (*j=0*); Combinations (*j=4*) included, but not reported  
 Industry (SIC)-, Tech (Patent subclass)- & Vintage- effects included

PIONEERING INVENTORS OR THICKET- BUILDERS: WHICH U.S. FIRMS USE CONTINUATIONS IN PATENTING?

Deepak Hegde, David C. Mowery and Stuart J. H. Graham

TABLE A2.3: MULTINOMIAL LOGIT ESTIMATES OF CONTINUATIONS DECISIONS FOR ELECTRICAL & ELECTRONICS PATENTS (PRIORITY YEARS 1981-2000, ISSUE YEARS 1981-2004)

| Explanatory variables                                                            | <i>CAP</i><br>( <i>j=1</i> ) | <i>CIP</i><br>( <i>j=2</i> ) | <i>Div</i><br>( <i>j=3</i> ) |
|----------------------------------------------------------------------------------|------------------------------|------------------------------|------------------------------|
| lnRDINT*lnPATINT                                                                 | -0.114<br>[0.020]**          | 0.055<br>[0.025]*            | -0.103<br>[0.027]**          |
| lnCAPINT*lnPATINT                                                                | 0.393<br>[0.027]**           | -0.101<br>[0.035]**          | 0.35<br>[0.034]**            |
| FCITES                                                                           | -0.057<br>[0.004]**          | 0.031<br>[0.004]**           | -0.079<br>[0.004]**          |
| lnPATINT                                                                         | -1.269<br>[0.096]**          | 0.289<br>[0.132]*            | -1.143<br>[0.127]**          |
| lnRDINT                                                                          | 0.104<br>[0.025]**           | -0.125<br>[0.033]**          | 0.08<br>[0.033]*             |
| lnCAPINT                                                                         | 0.226<br>[0.034]**           | 0.041<br>[0.047]             | 0.217<br>[0.039]**           |
| TECHSHARE                                                                        | 0.385<br>[0.089]**           | 0.204<br>[0.120]             | -0.373<br>[0.124]**          |
| TECHTIME                                                                         | -0.07<br>[0.006]**           | -0.013<br>[0.008]            | -0.054<br>[0.007]**          |
| ln employment                                                                    | 0.062<br>[0.015]**           | -0.207<br>[0.021]**          | 0.059<br>[0.020]**           |
| lnAGE                                                                            | -0.135<br>[0.027]**          | -0.056<br>[0.035]            | 0.017<br>[0.034]             |
| Constant                                                                         | -3.643<br>[0.325]**          | -0.953<br>[0.414]*           | -3.524<br>[0.453]**          |
| Total Observations                                                               | 77484                        |                              |                              |
| Model chi-square                                                                 | 12712.61                     |                              |                              |
| Standard errors in brackets; * significant at 5%; ** significant at 1%           |                              |                              |                              |
| Base class: no continuation (j=0); Combinations (j=4) included, but not reported |                              |                              |                              |
| Industry (SIC)-, Tech (Patent subclass)- & Vintage- effects included             |                              |                              |                              |

PIONEERING INVENTORS OR THICKET- BUILDERS: WHICH U.S. FIRMS USE CONTINUATIONS IN PATENTING?

Deepak Hegde, David C. Mowery and Stuart J. H. Graham

TABLE A2.4: MULTINOMIAL LOGIT ESTIMATES OF CONTINUATIONS DECISIONS FOR COMPUTERS & COMMUNICATIONS PATENTS (PRIORITY YEARS 1981-2000, ISSUE YEARS 1981-2004)

| Explanatory variables | <i>CAP</i><br>( <i>j=1</i> ) | <i>CIP</i><br>( <i>j=2</i> ) | <i>Div</i><br>( <i>j=3</i> ) |
|-----------------------|------------------------------|------------------------------|------------------------------|
| lnRDINT*lnPATINT      | -0.105<br>[0.017]**          | 0.017<br>[0.022]             | -0.068<br>[0.031]*           |
| lnCAPINT*lnPATINT     | 0.357<br>[0.021]**           | -0.093<br>[0.030]**          | 0.359<br>[0.035]**           |
| FCITES                | -0.021<br>[0.002]**          | 0.022<br>[0.003]**           | -0.069<br>[0.005]**          |
| lnPATINT              | -1.159<br>[0.079]**          | 0.35<br>[0.119]**            | -1.316<br>[0.140]**          |
| lnRDINT               | 0.201<br>[0.025]**           | -0.032<br>[0.034]            | 0.128<br>[0.043]**           |
| lnCAPINT              | 0.361<br>[0.026]**           | 0.08<br>[0.041]              | 0.208<br>[0.046]**           |
| TECHSHARE             | 0.829<br>[0.074]**           | 0.494<br>[0.113]**           | 0.358<br>[0.129]**           |
| TECHTIME              | -0.062<br>[0.006]**          | -0.005<br>[0.009]            | -0.048<br>[0.010]**          |
| ln employment         | 0.066<br>[0.013]**           | -0.191<br>[0.020]**          | -0.058<br>[0.023]*           |
| lnAGE                 | -0.106<br>[0.026]**          | 0.051<br>[0.039]             | 0.034<br>[0.047]             |
| Constant              | -4.727<br>[0.509]**          | -0.747<br>[0.477]            | -2.32<br>[0.506]**           |
| Total Observations    | 92268                        |                              |                              |
| Model chi-square      | 13299.47                     |                              |                              |

Standard errors in brackets; \* significant at 5%; \*\* significant at 1%  
Base class: no continuation (j=0); Combinations (j=4) included, but not reported  
Industry (SIC)-, Tech (Patent subclass)- & Vintage- effects included

PIONEERING INVENTORS OR THICKET- BUILDERS: WHICH U.S. FIRMS USE CONTINUATIONS IN PATENTING?

Deepak Hegde, David C. Mowery and Stuart J. H. Graham

TABLE A2.5: MULTINOMIAL LOGIT ESTIMATES OF CONTINUATIONS DECISIONS FOR MECHANICAL PATENTS (PRIORITY YEARS 1981-2000, ISSUE YEARS 1981-2004)

| Explanatory variables | <i>CAP</i><br>( <i>j=1</i> ) | <i>CIP</i><br>( <i>j=2</i> ) | <i>Div</i><br>( <i>j=3</i> ) |
|-----------------------|------------------------------|------------------------------|------------------------------|
| lnRDINT*lnPATINT      | 0.08<br>[0.025]**            | 0.038<br>[0.024]             | 0.018<br>[0.024]             |
| lnCAPINT*lnPATINT     | 0.037<br>[0.036]             | -0.086<br>[0.039]*           | 0.142<br>[0.035]**           |
| FCITES                | -0.009<br>[0.007]            | 0.049<br>[0.006]**           | -0.086<br>[0.008]**          |
| lnPATINT              | -0.106<br>[0.142]            | 0.426<br>[0.158]**           | -0.453<br>[0.142]**          |
| lnRDINT               | 0.221<br>[0.033]**           | 0.101<br>[0.037]**           | 0.251<br>[0.034]**           |
| lnCAPINT              | -0.172<br>[0.049]**          | -0.1<br>[0.055]              | -0.066<br>[0.047]            |
| TECHSHARE             | 0.525<br>[0.128]**           | 0.61<br>[0.134]**            | 0.212<br>[0.142]             |
| TECHTIME              | -0.036<br>[0.009]**          | -0.024<br>[0.009]*           | -0.051<br>[0.008]**          |
| ln employment         | -0.027<br>[0.022]            | -0.143<br>[0.025]**          | -0.031<br>[0.023]            |
| ln AGE                | 0.031<br>[0.031]             | 0.078<br>[0.035]*            | 0.095<br>[0.032]**           |
| Constant              | -2.054<br>[0.382]**          | -1.65<br>[0.429]**           | -3.201<br>[0.379]**          |
| Total Observations    | 47703                        |                              |                              |
| Model chi-square      | 6214.794                     |                              |                              |

Standard errors in brackets; \* significant at 5%; \*\* significant at 1%  
Base class: no continuation (j=0); Combinations (j=4) included, but not reported  
Industry (SIC)-, Tech (Patent subclass)- & Vintage- effects included
